# Supplementary material for: The Influence of Electrolyte Type on Kinetics of Redox Processes in the Polymer Films of Ni(II) Salen-Type Complexes
Source: MDPI journal article supplement (doi:10.3390/molecules27061812), 2022-03-10
Supplement: s1 [file s1]

## The influence of electrolyte type on kinetics of redox processes in the polymer films of Ni(II) *salen* type complexes

D. Tomczyk<sup>\*1</sup>, P. Seliger<sup>1</sup>, W. Bukowski<sup>2</sup>, K. Bester<sup>2</sup>

### Figures

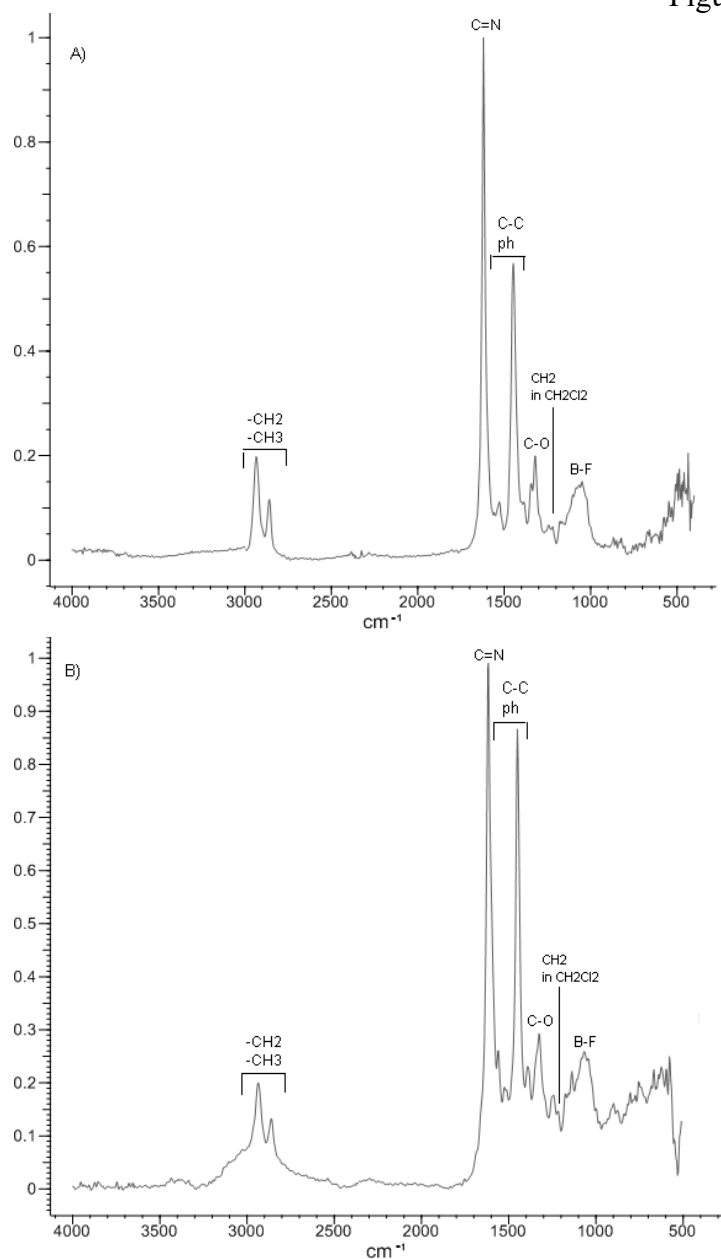

**Figure S1.** FTIR ATR spectra of *poly*[Ni(*salen*(Me))] electrosynthesized in TBABF<sub>4</sub>/CH<sub>2</sub>Cl<sub>2</sub> ( $v = 0.05 \text{ V} \cdot \text{s}^{-1}$ , 10 scans, vs. Ag/AgCl), A) - neutral, B) - oxidized at the anode peak potential,  $E_{pa} = 0.6 \text{ V}$ .

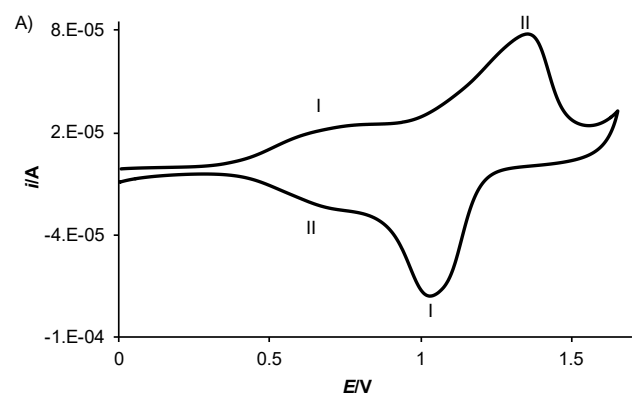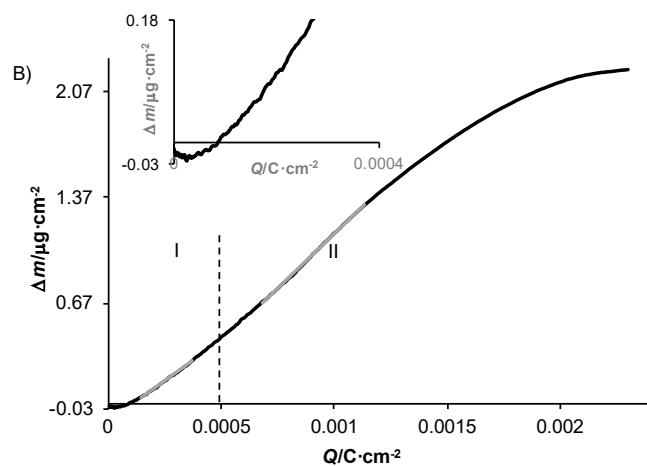

**Figure S2.** *Poly*[Ni(salcn)] (1 electropolymerization cycle) in TBAPF<sub>6</sub>/CH<sub>2</sub>Cl<sub>2</sub>, Pt/quarzglas,  $\nu = 0.05 \text{ V}\cdot\text{s}^{-1}$ , vs. Ag/AgCl; A) cyclic voltammogram; B) plots  $\Delta m$  vs  $Q$  for anodic process; grey parts of the curve - trend lines for the  $\Delta m = f(Q)$  relationship.

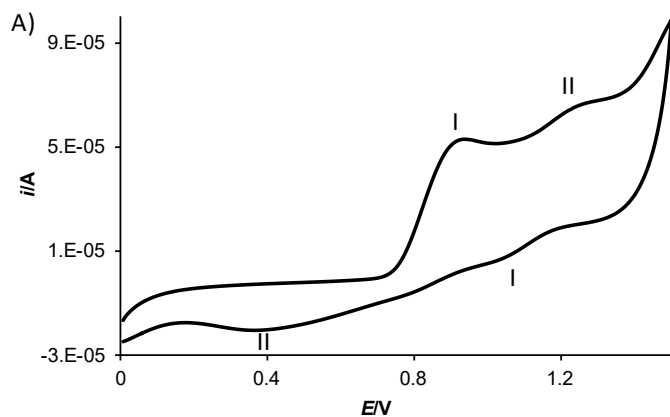

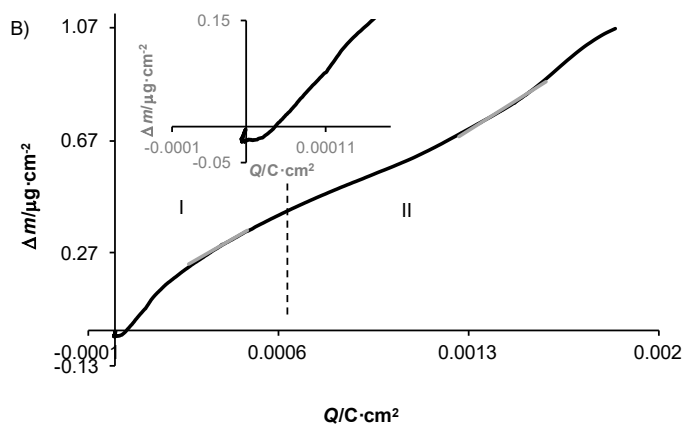

**Figure S3.** *Poly*[Ni(salcn)] (1 electropolymerization cycle) in TBABF<sub>4</sub>/CH<sub>2</sub>Cl<sub>2</sub>, Pt/quarzglas,  $\nu = 0.05$  V·s<sup>-1</sup>, vs. Ag/AgCl; A) cyclic voltammogram; B) plots  $\Delta m$  vs  $Q$  for anodic process; grey parts of the curve - trend lines for the  $\Delta m = f(Q)$  relationship.

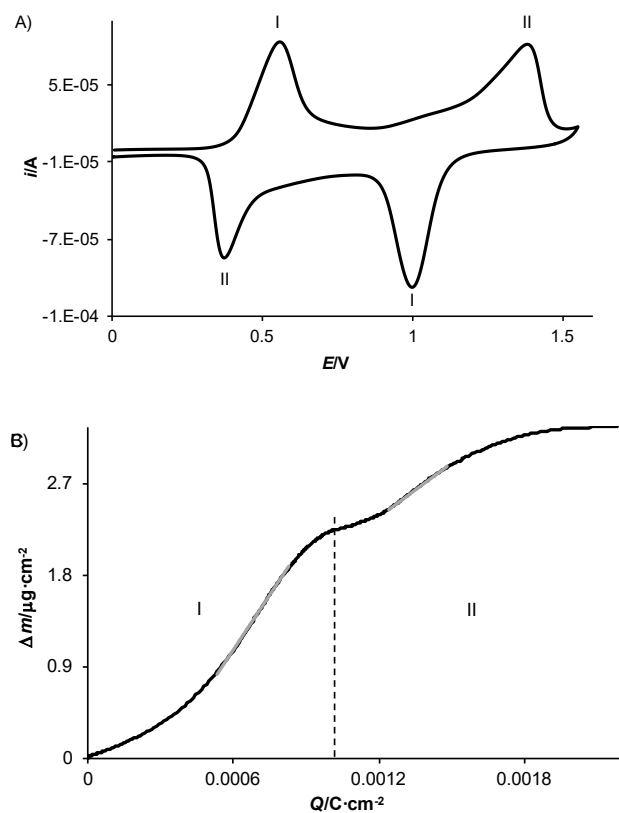

**Figure S4.** *Poly*[Ni(salcn(Me))]] (1 electropolymerization cycle) in TBAPF<sub>6</sub>/CH<sub>2</sub>Cl<sub>2</sub>, Pt/quarzglas,  $\nu = 0.05$  V·s<sup>-1</sup>, vs. Ag/AgCl; A) cyclic voltammogram; B) plot  $\Delta m$  vs  $Q$  for oxidation process; grey parts of the curve - trend lines for the  $\Delta m = f(Q)$  relationship.

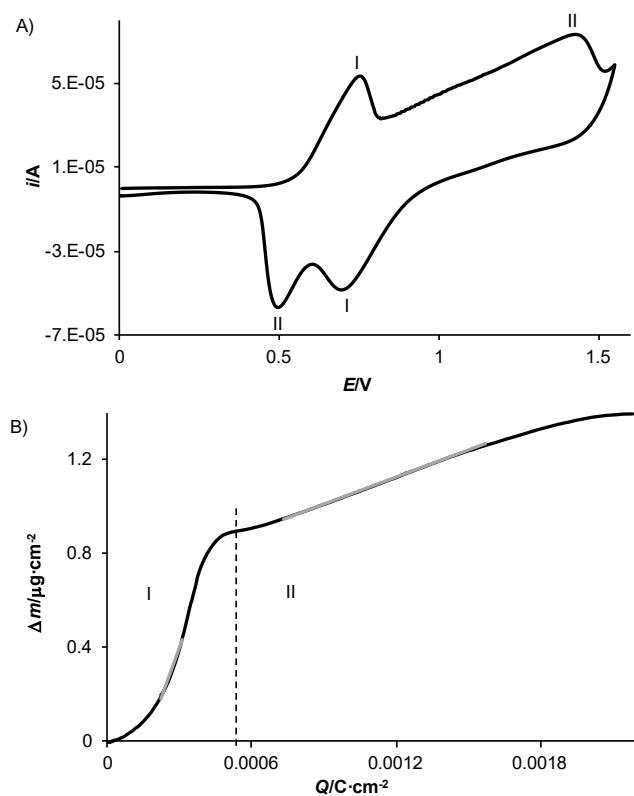

**Figure S5.** Poly[Ni(salcn(Me))]  
 (1 electropolymerization cycle) in TBABF<sub>4</sub>/CH<sub>2</sub>Cl<sub>2</sub>, Pt/quartzglas,  $\nu = 0.05 \text{ V} \cdot \text{s}^{-1}$ , vs. Ag/AgCl; A) cyclic voltammogram; B) plot  $\Delta m$  vs  $Q$  for anodic process; grey parts of the curve - trend lines for the  $\Delta m = f(Q)$  relationship.

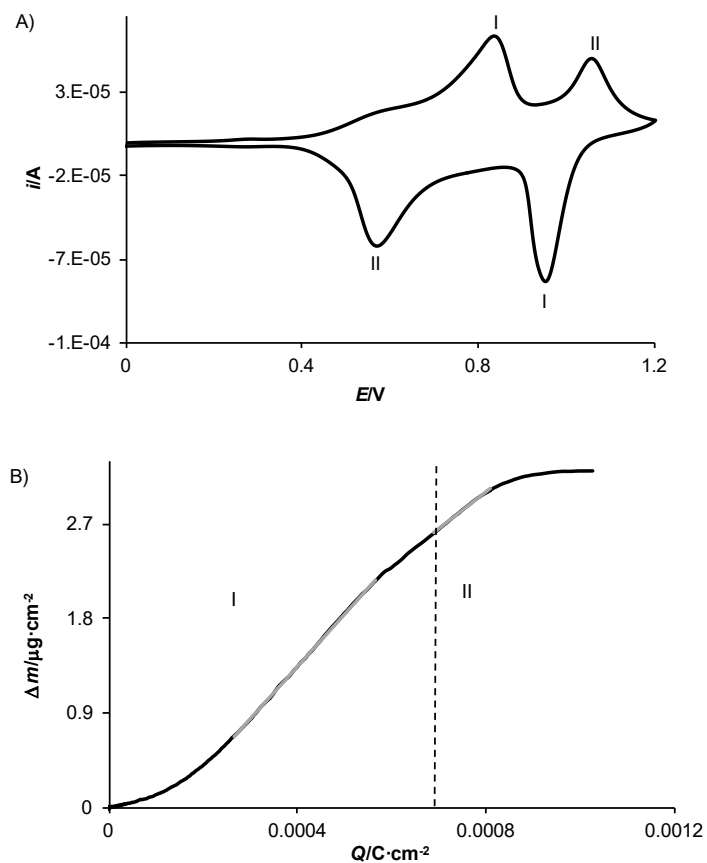

**Figure S6.**  $\text{Poly}[\text{Ni}(\text{salcn}(\text{Bu}))]$  (1 electropolymerization cycle) in  $\text{TBAPF}_6/\text{CH}_2\text{Cl}_2$ , Pt/quartzglas,  $\nu = 0.05 \text{ V}\cdot\text{s}^{-1}$ , vs. Ag/AgCl; A) cyclic voltammogram; B) plot  $\Delta m$  vs  $Q$  for anodic process; grey parts of the curve - trend lines for the  $\Delta m = f(Q)$  relationship.

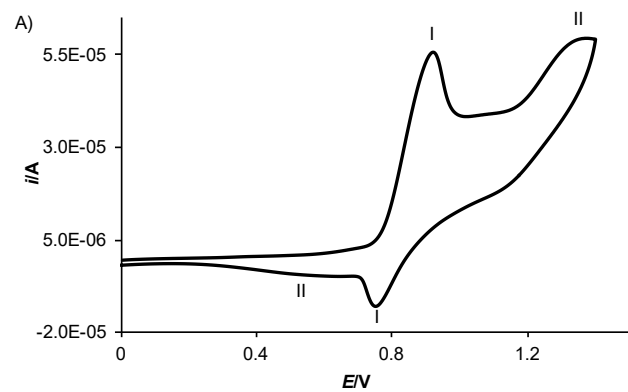

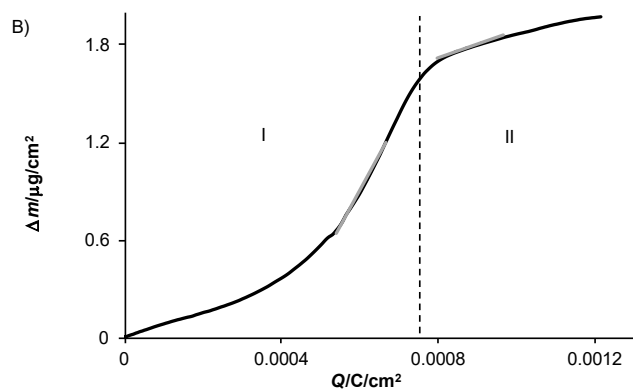

**Figure S7.** *Poly*[Ni(salcn(Bu))] (1 electropolymerization cycle) in TBABF<sub>4</sub>/CH<sub>2</sub>Cl<sub>2</sub>, Pt/quarzglas,  $\nu = 0.05 \text{ V}\cdot\text{s}^{-1}$ , vs. Ag/AgCl; A) cyclic voltammogram; B) plot  $\Delta m$  vs  $Q$  for anodic process; grey parts of the curve - trend lines for the  $\Delta m = f(Q)$  relationship.

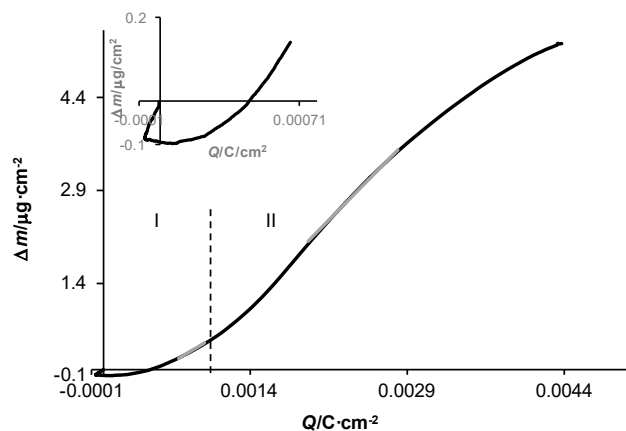

**Figure S8.** Plots  $\Delta m$  vs  $Q$  for *poly*[Ni(salcn)] for anodic process (1 electropolymerization cycle) in TBAPF<sub>6</sub>/CH<sub>2</sub>Cl<sub>2</sub>, Pt/quarzglas,  $\nu = 0.01 \text{ V}\cdot\text{s}^{-1}$ , vs. Ag/AgCl; grey parts of the curve - trend lines for the  $\Delta m = f(Q)$  relationship.

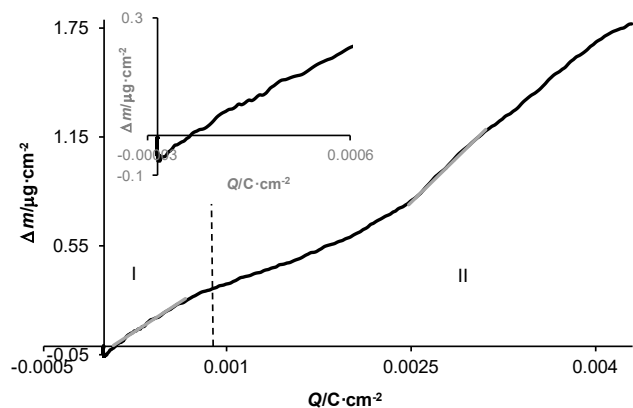

**Figure S9.** Plots  $\Delta m$  vs  $Q$  for *poly*[Ni(salcn)] for anodic process (1 electropolymerization cycle) in TBABF<sub>4</sub>/CH<sub>2</sub>Cl<sub>2</sub>, Pt/quarzglas,  $\nu = 0.01 \text{ V}\cdot\text{s}^{-1}$ , vs. Ag/AgCl; grey parts of the curve - trend lines for the  $\Delta m = f(Q)$  relationship.

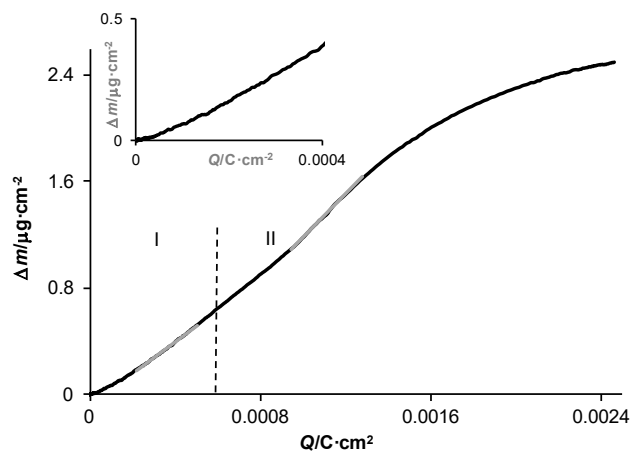

**Figure S10.** Plots  $\Delta m$  vs  $Q$  for *poly*[Ni(salcn)] for anodic process (1 electropolymerization cycle) in TBAPF<sub>6</sub>/CH<sub>2</sub>Cl<sub>2</sub>, Pt/quarzglas,  $\nu = 0.05 \text{ V} \cdot \text{s}^{-1}$ , after reduction 40 s at 0 V, vs. Ag/AgCl; grey parts of the curve - trend lines for the  $\Delta m = f(Q)$  relationship.

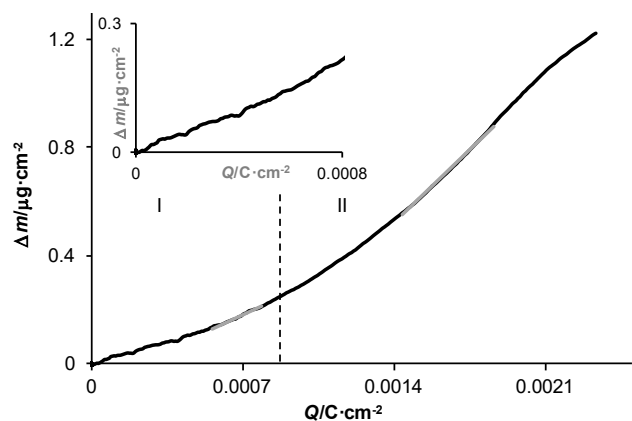

**Figure S11.** Plots  $\Delta m$  vs  $Q$  for *poly*[Ni(salcn)] for anodic process (1 electropolymerization cycle) in TBABF<sub>4</sub>/CH<sub>2</sub>Cl<sub>2</sub>, Pt/quarzglas,  $\nu = 0.05 \text{ V} \cdot \text{s}^{-1}$ , after reduction 40 s at 0 V, vs. Ag/AgCl; grey parts of the curve - trend lines for the  $\Delta m = f(Q)$  relationship.

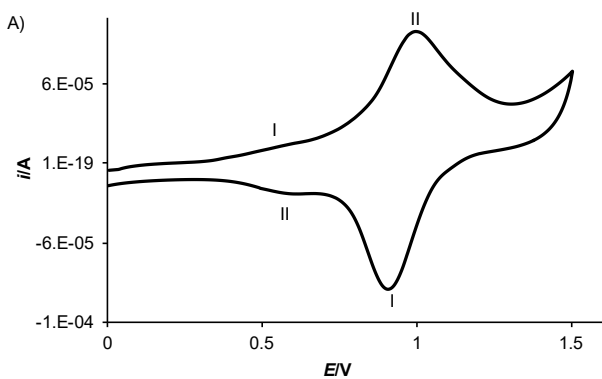

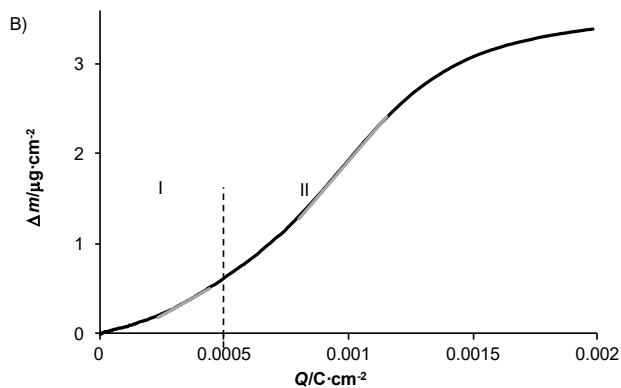

**Figure S12.** Figure S12. *Poly*[Ni(salcn)] (1 electropolymerization cycle) in TBAPF<sub>6</sub>/MeCN, Pt/quarzglas ,  $\nu = 0.05 \text{ V}\cdot\text{s}^{-1}$ , vs. Ag/AgCl; A) cyclic voltammogram; B) plot  $\Delta m$  vs  $Q$  for anodic process; grey parts of the curve - trend lines for the  $\Delta m = f(Q)$  relationship.

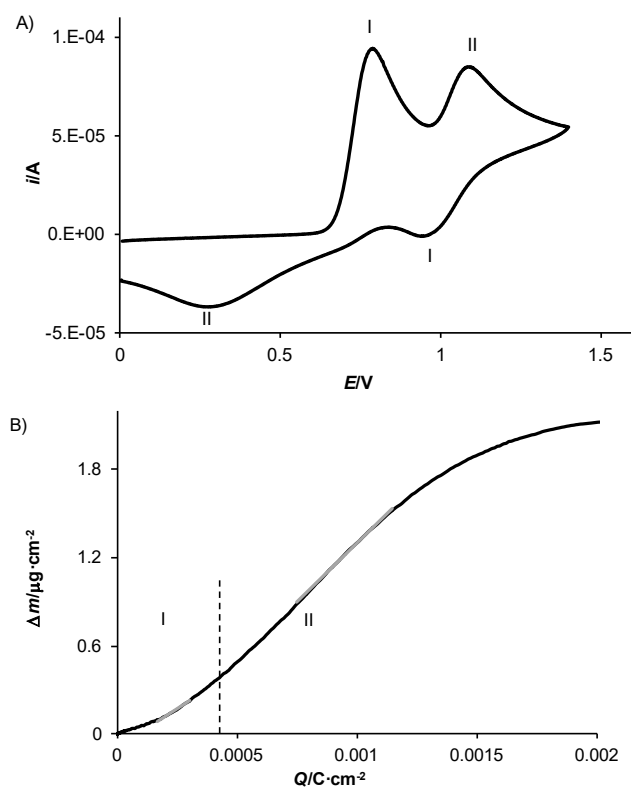

**Figure S13.** *Poly*[Ni(salcn)] (1 electropolymerization cycle) in TBABF<sub>4</sub>/MeCN, Pt/quarzglas ,  $\nu = 0.05 \text{ V}\cdot\text{s}^{-1}$ , vs. Ag/AgCl; A) cyclic voltammogram; B) plot  $\Delta m$  vs  $Q$  for anodic process; grey parts of the curve - trend lines for the  $\Delta m = f(Q)$  relationship.



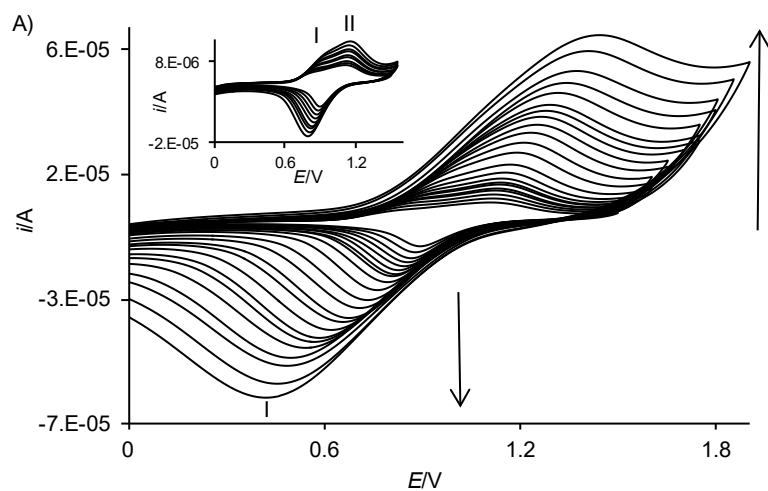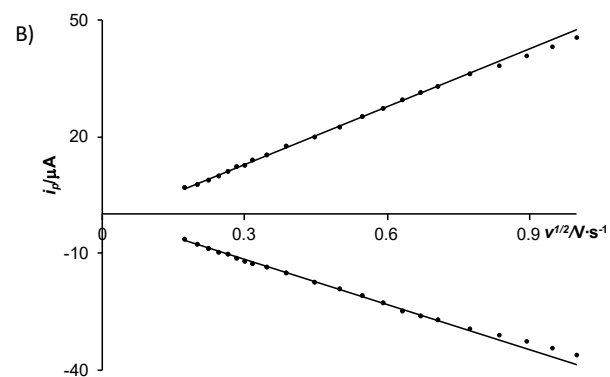

**Figure S14.** *Poly*[Ni(salcn)] (10 electropolymerization cycles) in TBAClO<sub>4</sub>/CH<sub>2</sub>Cl<sub>2</sub>, Pt,  $\nu = 0.03 - 1 \text{ V} \cdot \text{s}^{-1}$ , vs. Ag/AgCl; A) the lower part - cyclic voltammograms; the upper part – voltammograms for  $\nu = 0.01 - 0.09 \text{ V} \cdot \text{s}^{-1}$ ; B) plots  $i_p$  vs  $\nu^{1/2}$  for oxidation and reduction processes.

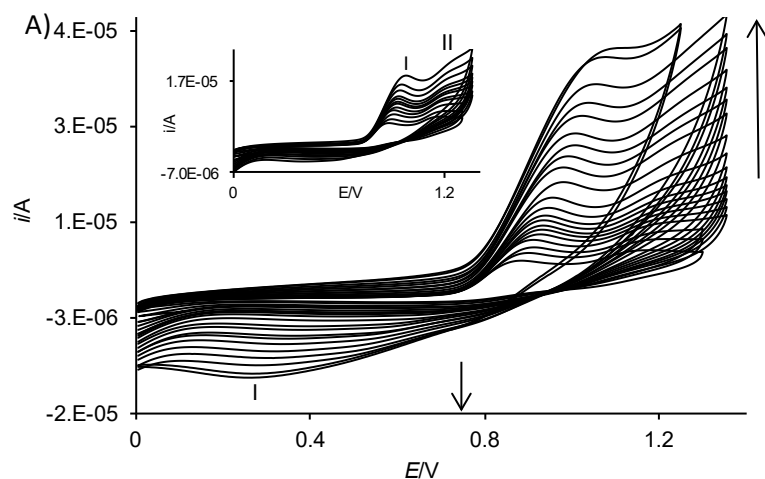

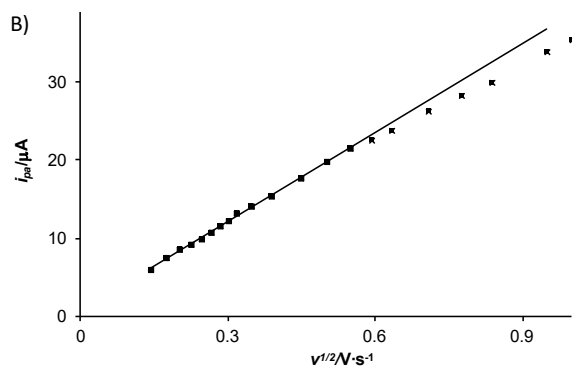

**Figure S15.** *Poly*[Ni(salcn)] (3 electropolymerization cycles) in TBABF<sub>4</sub>/CH<sub>2</sub>Cl<sub>2</sub>, Pt,  $\nu = 0.02 - 1 \text{ V} \cdot \text{s}^{-1}$ , vs. Ag/AgCl; A) the lower part - cyclic voltammograms; the upper part – voltammograms for  $\nu = 0.01 - 0.15 \text{ V} \cdot \text{s}^{-1}$ ; B) plot  $i_{pa}$  vs  $\nu^{1/2}$  for oxidation process.

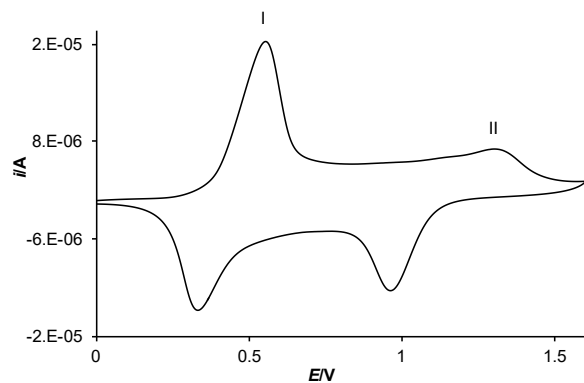

**Figure S16.** Cyclic voltammogram of *poly*[Ni(salcn(Me))]<sub>10</sub> (10 electropolymerization cycles) in TBAClO<sub>4</sub>/CH<sub>2</sub>Cl<sub>2</sub>, Pt,  $\nu = 0.05 \text{ V} \cdot \text{s}^{-1}$ , vs. Ag/AgCl.

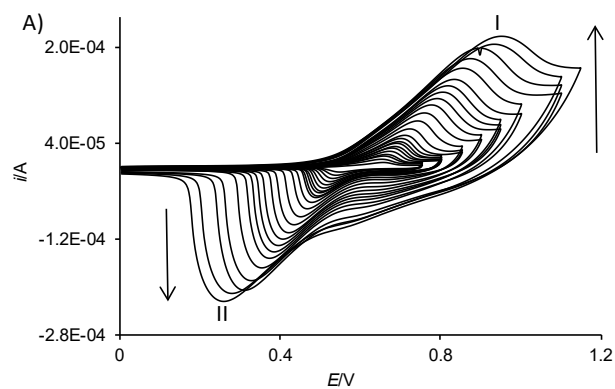

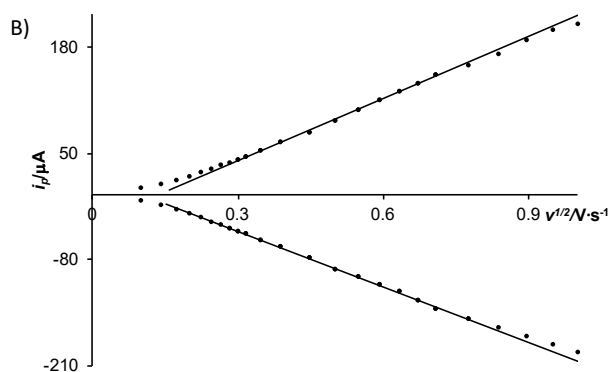

**Figure S17.** *Poly[Ni(salcn(Me))]* (15 electropolymerization cycles) in  $\text{TBABF}_4/\text{CH}_2\text{Cl}_2$ , Pt,  $\nu = 0.01 - 1 \text{ V}\cdot\text{s}^{-1}$ , vs. Ag/AgCl; A) cyclic voltammograms for one-step process, peak notations were used adequate to peak designation in a two-step process, see Figure 3; B) plots  $i_{pa}$  vs  $\nu^{1/2}$  for oxidation and reduction processes.

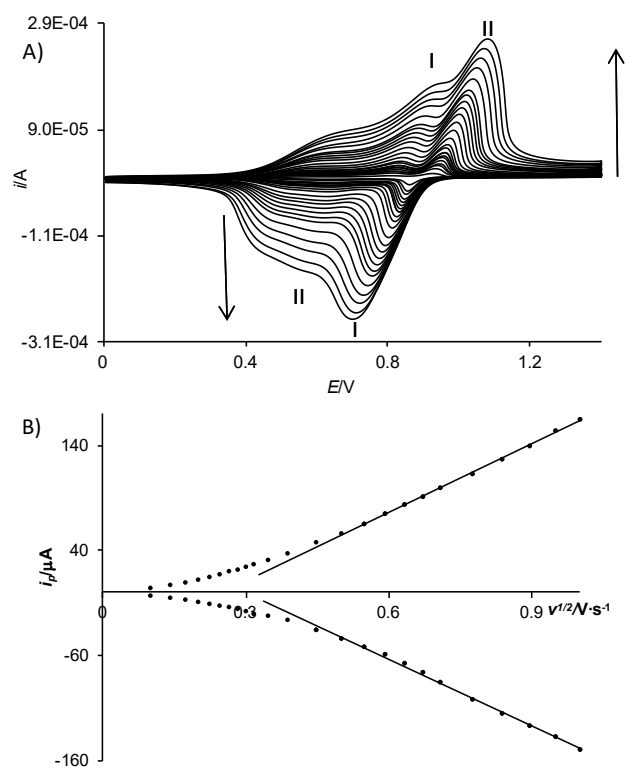

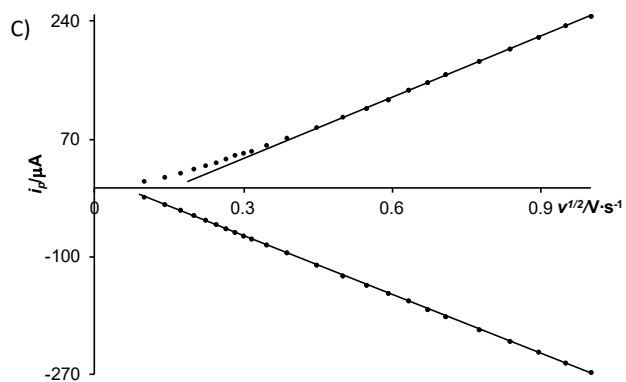

**Figure S18.** *Poly*[Ni(salcn(Bu))] (25 electropolymerization cycles) in TBAClO<sub>4</sub>/CH<sub>2</sub>Cl<sub>2</sub>, Pt,  $\nu = 0.01 - 1 \text{ V} \cdot \text{s}^{-1}$ , vs. Ag/AgCl; A) cyclic voltammograms; B) plots  $i_p$  vs  $\nu^{1/2}$  for I<sup>st</sup> oxidation step of the process and II<sup>nd</sup> reduction step; C) plots  $i_p$  vs  $\nu^{1/2}$  for II<sup>nd</sup> oxidation step of the process and I<sup>st</sup> reduction step.

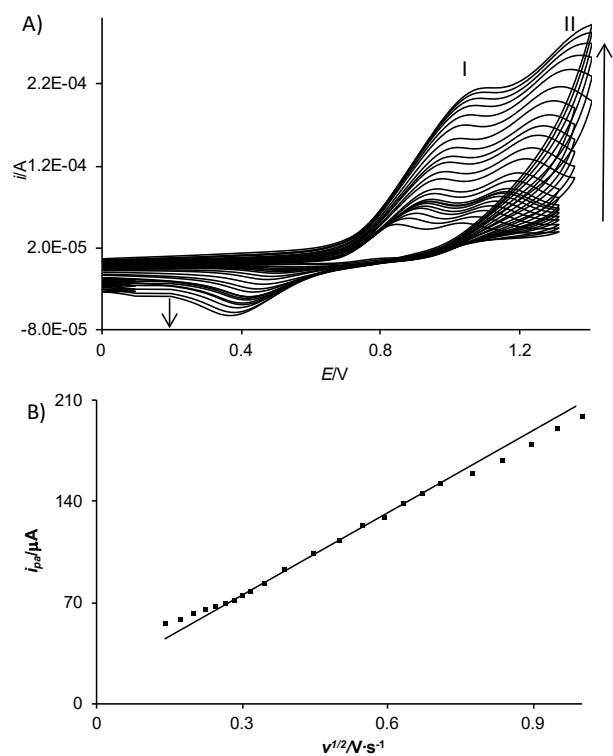

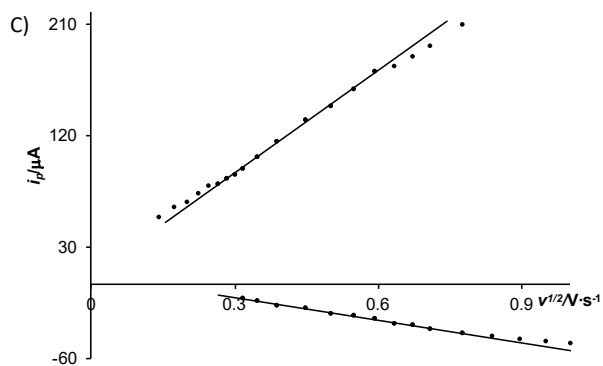

**Figure S19.** *Poly*[Ni(salcn(Bu))] (25 electropolymerization cycles) in TBABF<sub>4</sub>/CH<sub>2</sub>Cl<sub>2</sub>, Pt,  $\nu = 0.02 - 1 \text{ V}\cdot\text{s}^{-1}$ , vs. Ag/AgCl; A) cyclic voltammograms; B) plot  $i_p$  vs  $\nu^{1/2}$  for I<sup>st</sup> oxidation step of the process; C) plots  $i_p$  vs  $\nu^{1/2}$  for II<sup>nd</sup> oxidation step of the process and I<sup>st</sup> reduction step.

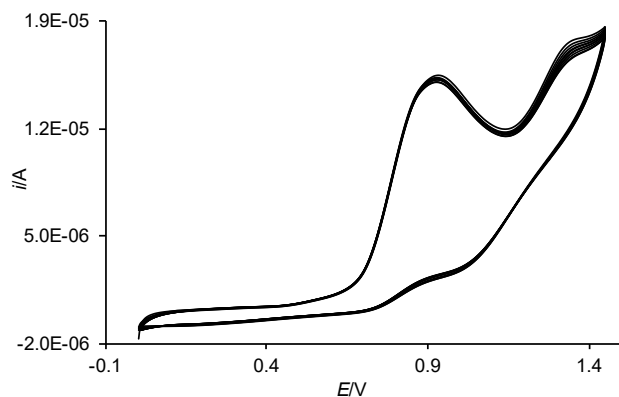

**Figure S20.** Cyclic voltammograms of *poly*[Ni(salcn)], 1<sup>st</sup>-10<sup>th</sup> cycle, in TBABF<sub>4</sub>/CH<sub>2</sub>Cl<sub>2</sub>, Pt,  $\nu = 0.05 \text{ V}\cdot\text{s}^{-1}$ , vs. Ag/AgCl; after 5 electropolymerization cycles.

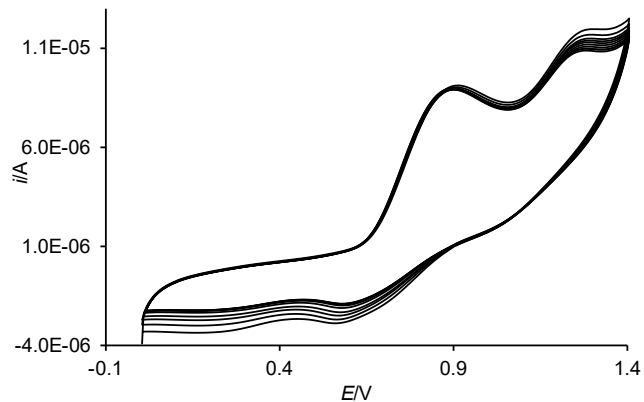

**Figure S21.** Cyclic voltammograms of *poly*[Ni(salcn(Bu))], 1<sup>st</sup>-10<sup>th</sup> cycle, in TBABF<sub>4</sub>/CH<sub>2</sub>Cl<sub>2</sub>, Pt,  $\nu = 0.05 \text{ V}\cdot\text{s}^{-1}$ , vs. Ag/AgCl; after 5 electropolymerization cycles.

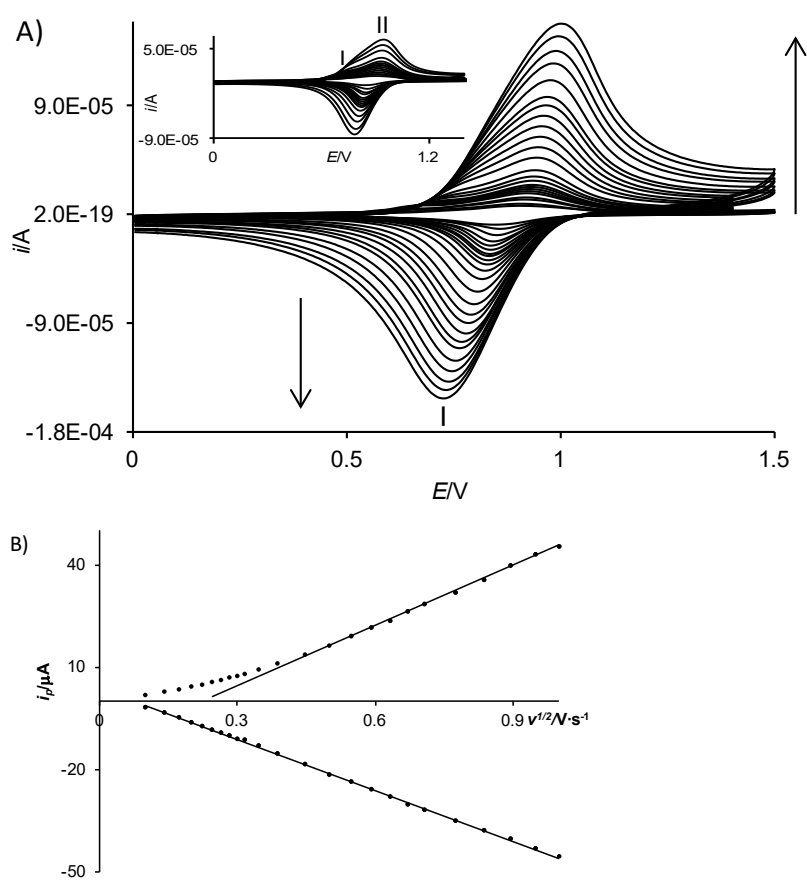

**Figure S22.** *Poly*[Ni(salcn)] (3 electropolymerization cycles) in TBAClO<sub>4</sub>/MeCN, Pt,  $\nu = 0.01 - 1 \text{ V}\cdot\text{s}^{-1}$ , vs. Ag/AgCl; A) the lower part - cyclic voltammograms, the upper part – voltammograms for  $\nu = 0.01 - 0.25 \text{ V}\cdot\text{s}^{-1}$ ; B) plots  $i_{pa}$  vs  $\nu^{1/2}$  for oxidation and reduction processes.

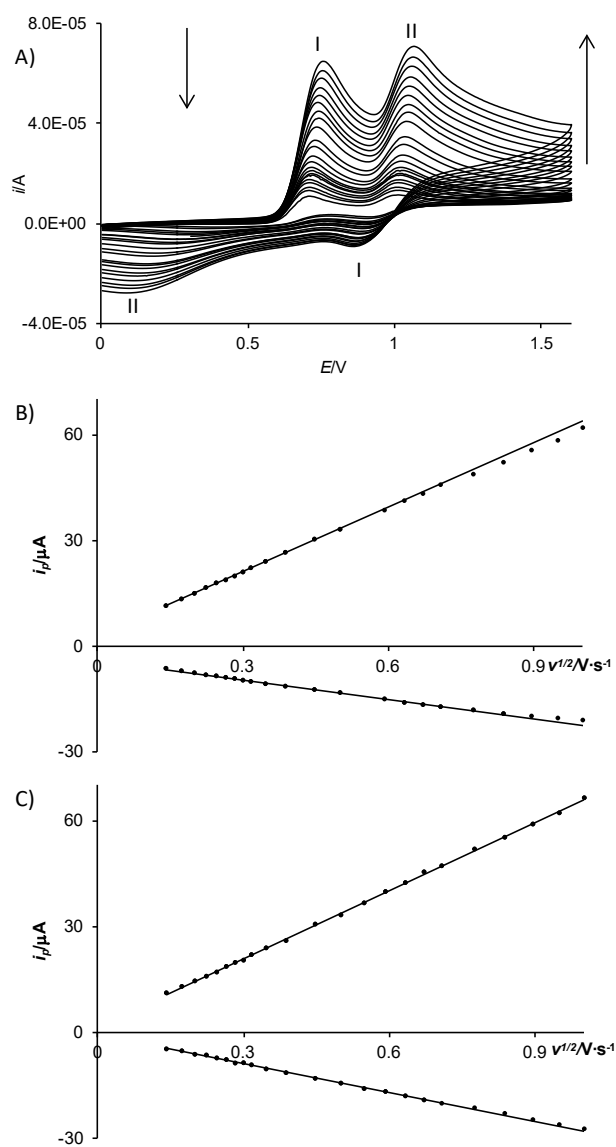

**Figure S23.** *Poly*[Ni(salcn)] (3 electropolymerization cycles) in TBABF<sub>4</sub>/MeCN, Pt,  $\nu = 0.02 - 1 \text{ V} \cdot \text{s}^{-1}$ , vs. Ag/AgCl; A) cyclic voltammograms; B) plots  $i_p$  vs  $\nu^{1/2}$  for I<sup>st</sup> oxidation step of the process and II<sup>nd</sup> reduction step; C) plots  $i_p$  vs  $\nu^{1/2}$  for II<sup>nd</sup> oxidation step of the process and I<sup>st</sup> reduction step.
